# Supplementary material for: MAGE-A11 is activated through TFCP2/ZEB1 binding sites de-methylation as well as histone modification and facilitates ESCC tumor growth
Source: PubMed Central journal article supplement (PMC5790469; doi:10.18632/oncotarget.22973), 2017-12-05
Supplement: oncotarget-09-3365-s001.pdf [file oncotarget-09-3365-s001.pdf]

# MAGE-A11 is activated through TFCP2/ZEB1 binding sites de-methylation as well as histone modification and facilitates ESCC tumor growth

## SUPPLEMENTARY MATERIALS

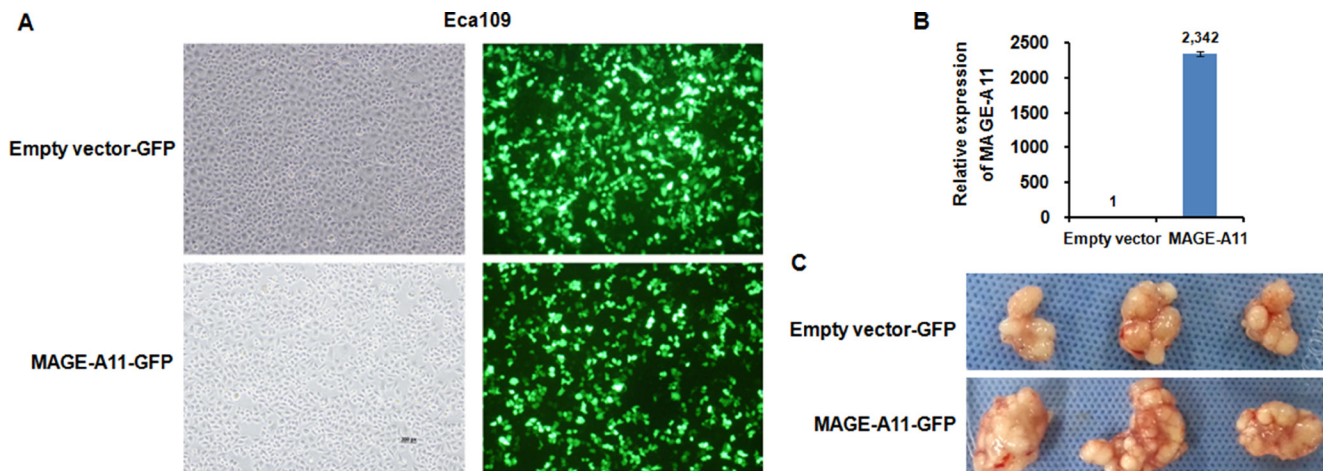

**Supplementary Figure 1:** (A) and (B) Transfection efficiency of MAGE-A11 in Eca109 cells. (C) Tumor size of Eca109 mice xenograft carrying MAGE-A11.

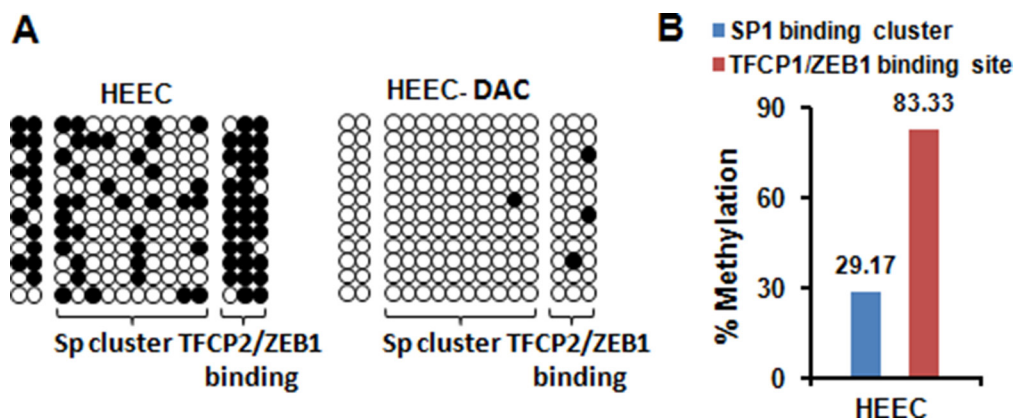

**Supplementary Figure 2:** The promoter of MAGE-A11 is hypermethylated in normal esophageal epithelial HEEC cells. (A) Bisulfite clonal sequencing showed the methylation status of the fifteen CG sites from -140 to +1 on MAGE-A11 promoter in HEEC cells before and after DAC treatment. (B) The methylation rate of the fifteen CG sites from -140 to +1 on MAGE-A11 promoter in HEEC cells.

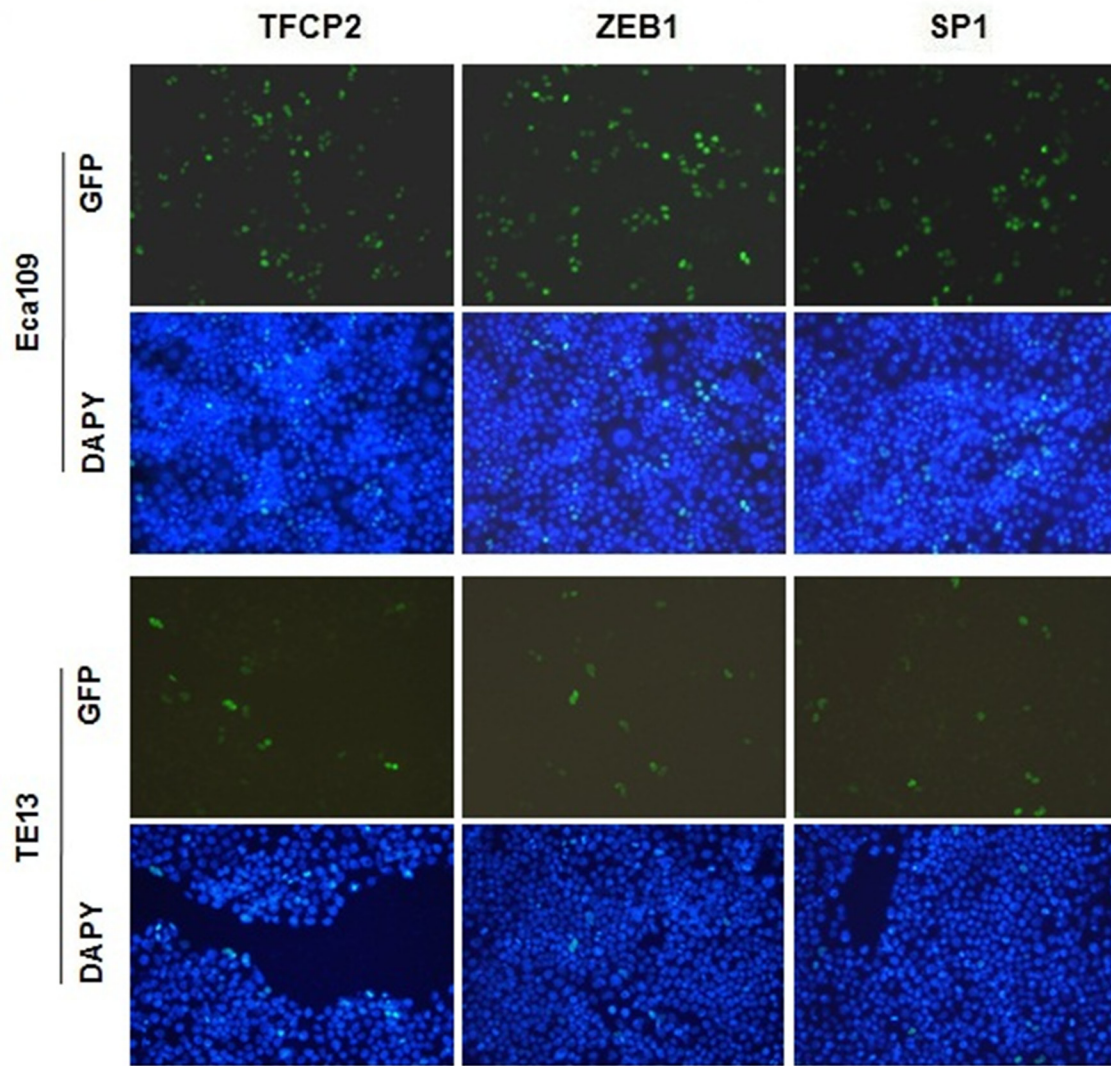

Supplementary Figure 3: The immunostaining experiment showed that TFCP2, ZEB1 and SP1 were detectable largely in cell nucleus.

**Supplementary Table 1: Expression of MAGE-A11 in ESCC tissues and the corresponding adjacent normal esophageal epithelial tissues**

| Tissues                              | Cases | MAGE-A11 |          | <i>P</i> |
|--------------------------------------|-------|----------|----------|----------|
|                                      |       | Negative | Positive |          |
| ESCC tissues                         | 106   | 46       | 60       | < 0.001  |
| Normal esophageal epithelial tissues | 106   | 106      | 0        |          |

**Supplementary Table 2: Correlation between MAGE-A11 expression and the clinicopathological parameters of ESCC patients**

| Variables                               | Cases | MAGE-A11 |    | $\chi^2$ | <i>P</i> |
|-----------------------------------------|-------|----------|----|----------|----------|
|                                         |       | -        | +  |          |          |
| <b>Age(y/s)</b>                         |       |          |    | 0.485    | 0.486    |
| ≤ 55                                    | 29    | 11       | 18 |          |          |
| > 55                                    | 77    | 35       | 42 |          |          |
| <b>Gender</b>                           |       |          |    |          |          |
| Male                                    | 72    | 30       | 42 | 0.273    | 0.601    |
| Female                                  | 34    | 16       | 18 |          |          |
| <b>Tumor location</b>                   |       |          |    | 0.189    | 0.664    |
| Cervical                                | 37    | 15       | 22 |          |          |
| Thoracic                                | 69    | 31       | 38 |          |          |
| <b>WHO grade</b>                        |       |          |    | 10.450   | 0.005    |
| G1                                      | 10    | 4        | 6  |          |          |
| G2                                      | 63    | 35       | 28 |          |          |
| G3-4                                    | 33    | 7        | 26 |          |          |
| <b>Tumor invasion</b>                   |       |          |    | 21.693   | 0.000    |
| T1-2                                    | 58    | 37       | 21 |          |          |
| T3-4                                    | 48    | 9        | 39 |          |          |
| <b>Lymph node metastasis</b>            |       |          |    | 23.002   | 0.000    |
| N0                                      | 18    | 17       | 1  |          |          |
| N1                                      | 88    | 29       | 59 |          |          |
| <b>TNM stage</b>                        |       |          |    | 17.157   | 0.000    |
| I-II                                    | 54    | 34       | 20 |          |          |
| III-VI                                  | 52    | 12       | 40 |          |          |
| <b>Distant metastasis or recurrence</b> |       |          |    | 22.050   | 0.000    |
| M0                                      | 68    | 41       | 27 |          |          |
| M1                                      | 38    | 5        | 33 |          |          |

**Supplementary Table 3: Cox multivariate analysis of prognostic factors on overall survival of ESCC patients**

| Variables                        | Univariate Analysis |              |                | Multivariate analysis |              |                |
|----------------------------------|---------------------|--------------|----------------|-----------------------|--------------|----------------|
|                                  | HR                  | 95% CI       | <i>p</i> Value | HR                    | 95% CI       | <i>p</i> Value |
| Age                              | 1.200               | 0.722–1.994  | 0.482          |                       |              |                |
| Gender                           | 0.693               | 0.423–1.133  | 0.143          |                       |              |                |
| Tumor invasion                   | 4.546               | 3.259–6.343  | < 0.001        | 1.411                 | 0.798–2.496  | 0.236          |
| Lymph node metastasis            | 9.084               | 5.376–15.438 | < 0.001        | 2.604                 | 1.245–5.446  | 0.011          |
| Distant metastasis or recurrence | 12.375              | 6.772–22.614 | < 0.001        | 0.477                 | 0.113–2.020  | 0.315          |
| TMN stage                        | 4.410               | 3.203–6.070  | < 0.001        | 4.988                 | 1.676–14.838 | 0.004          |
| Histological Grade               | 1.753               | 1.150–2.673  | 0.009          | 1.130                 | 0.760–1.681  | 0.546          |
| Tumor location                   | 0.843               | 0.518–1.372  | 0.492          |                       |              |                |
| MAGE-A11 expression              | 4.694               | 2.711–8.128  | < 0.001        | 4.457                 | 2.331–8.524  | < 0.001        |

**Supplementary Table 4: Primers for RT-qPCR**

| Genes           | Primers                                                                    |
|-----------------|----------------------------------------------------------------------------|
| <i>MAGE-A11</i> | Forward, 5'-CCTGACCTGATAGACCCTG-3'<br>Reverse, 5'-AGCATTCTGCCTTTGTG-3'     |
| <i>SP1</i>      | Forward, 5'-CTGCCGCTCCCAACTTAC-3'<br>Reverse, 5'-TTGCCTCCACTTCCTCGA-3'     |
| <i>TFCP2</i>    | Forward, 5'-GAAACTCCATGATGAAACCCTA-3'<br>Reverse, 5'-TCCACCTCCAGCCCTCTA-3' |
| <i>ZEB1</i>     | Forward, 5'-AAGTGCCGGTAGATGGTA-3'<br>Reverse, 5'-TTGTAGCGACTGGATTTT -3'    |
| <i>EZH2</i>     | Forward, 5'-CGCTTTTCTGTAGGCGATGT-3'<br>Reverse, 5'-TGGGTGTTGCATGAAAAGAA-3' |
| <i>GAPDH</i>    | Forward, 5'-AGCCACATCGCTCAGACAC-3'<br>Reverse, 5'-GCCCAATACGACCAATCC-3'    |

**Supplementary Table 5: Primers for MSP**

| <b>Genes</b>      | <b>Primers</b>                                                                   |
|-------------------|----------------------------------------------------------------------------------|
| <i>MAGE-A11 M</i> | Forward, 5'-GTTTCGTTTTTATACGGGTAGAATC-3'<br>Reverse, 5'-TTCTCTCAAATCCCAAAAACG-3' |
| <i>MAGE-A11 U</i> | Forward, 5'-TGTTTTTATATGGGTAGAATTGG-3'<br>Reverse, 5'-TTCTCTCAAATCCCAAAAACAAA-3' |

**Supplementary Table 6: Primers for BSP**

| <b>Genes</b>    | <b>Primers</b>                                                               |
|-----------------|------------------------------------------------------------------------------|
| <i>MAGE-A11</i> | Forward, 5'-ATTTAGAGTTAGAGATTTGGT-3'<br>Reverse, 5'-ACTCCTCAATCCTCCCTCAAC-3' |

**Supplementary Table 7: Antibodies used for Western blot**

| <b>Antibodies</b> | <b>Commercial Company</b>         |
|-------------------|-----------------------------------|
| MAGE-A11          | Abcam, USA                        |
| SP1               | ACTIVE MOTIF, USA                 |
| TFCP2             | BD Biosciences, USA               |
| ZEB1              | Santa Cruz Biotechnology, USA     |
| H3                | Proteintech, USA                  |
| Tubulin           | Sino Biological Inc, China        |
| MeCP2             | Abcam, USA                        |
| EZH2              | BD Transduction Laboratories, USA |
| H3K27me3          | Cell Signaling, USA               |
| $\beta$ -actin    | Abcam, USA                        |

**Supplementary Table 8: Antibodies used for ChIP**

| <b>Antibodies</b> | <b>Commercial Company</b>     |
|-------------------|-------------------------------|
| SP1               | ACTIVE MOTIF, USA             |
| TFCP2             | BD Biosciences, USA           |
| ZEB1              | Santa Cruz Biotechnology, USA |
| MBD1              | Abcam, USA                    |
| HDAC1             | Abcam, USA                    |
| HDAC2             | Abcam, USA                    |
| H3K27me3          | Cell Signaling, USA           |
| H3K9me3           | Cell Signaling, USA           |
| H3K4me3           | Cell Signaling, USA           |
